# Supplementary material for: Stability, electronic properties and CO adsorption properties of bimetallic PtAg/Pt(111) surfaces
Source: Royal Society of Chemistry journal article supplement (doi:10.1039/d4cp01640h), 2024-01-01
Supplement: d4cp01640h1.pdf [file d4cp01640h1.pdf]

## **Electronic Supplementary Information**

### **Stability, Electronic Properties and CO Adsorption Properties of Bimetallic PtAg/Pt(111) Surfaces**

Luis A. Mancera, Axel Groß, and R. Jürgen Behm

Institute of Theoretical Chemistry, Ulm University, Oberberghof 7, D-89081 Ulm, Germany

TABLE S1. Formation enthalpies ( $\Delta H$ ), surface energies ( $E_S$ ) and estimated surface energies of the top surface ( $E_{S,top}$ , see text) for pure Pt(111) and Ag(111) surfaces and for  $\text{Ag}_n\text{L}/\text{Pt}(111)$  pseudomorphic overlayers, varying the number of Ag layers. Surface energies and formation enthalpies are given in  $\text{meV } \text{\AA}^{-2}$ .  $\text{Ag}_{5\text{L}}/\text{Pt}_{0\text{L}}$  denotes the pure Ag(111) surface, keeping the lateral lattice parameter of Pt(111), whereas  $\text{Ag}_{5\text{L}}$  denotes the pure Ag(111) surface with the Ag lattice parameter. Note the conversion:  $1 \text{ meV } \text{\AA}^{-2} \approx 16.02 \times 10^{-3} \text{ J m}^{-2}$ . For systems with a Pt(111) lattice, 1 meV per surface atom corresponds to  $0.1451 \text{ meV } \text{\AA}^{-2}$  for a slab of identical thickness (nearest neighbor distance  $2.82 \text{ \AA}$ ). Results were obtained using RPBE/PAW (for data derived from PBE/PAW see Table 1).

| Ensemble                                                            | $\Delta H$ | $E_S$ | $E_{S,top}$ |
|---------------------------------------------------------------------|------------|-------|-------------|
| $\text{Pt}_{5\text{L}}$                                             | 0.00       | 84.9  | 84.9        |
| $\text{Ag}_{1\text{L}}/\text{Pt}_{4\text{L}}$                       | -39.2      | 65.1  | 45.3        |
| $\text{Ag}_{2\text{L}}/\text{Pt}_{3\text{L}}$                       | -36.3      | 66.8  | 48.7        |
| $\text{Pt}_{1\text{L}}/\text{Ag}_{1\text{L}}/\text{Pt}_{3\text{L}}$ | -20.3      | 74.5  | 64.1        |
| $\text{Ag}_{3\text{L}}/\text{Pt}_{2\text{L}}$                       | -30.5      | 69.7  | 54.5        |
| $\text{Pt}_{2\text{L}}/\text{Ag}_{1\text{L}}/\text{Pt}_{2\text{L}}$ | +11.6      | 90.4  | 95.9        |
| $\text{Pt}_{1\text{L}}/\text{Ag}_{2\text{L}}/\text{Pt}_{2\text{L}}$ | -18.9      | 75.6  | 66.3        |
| $\text{Ag}_{5\text{L}}/\text{Pt}_{0\text{L}}$                       | --         | 3.4   | --          |
| $\text{Ag}_{5\text{L}}$                                             | --         | 36.0  | --          |

TABLE S2. Mean enthalpies of formation (upper lines), differential enthalpies of formation (middle lines), and surface energies (bottom lines), for the different PtAg/Ag<sub>nL</sub>/Pt(111) surface alloys considered. Surface energies and formation enthalpies are given in meV Å<sup>-2</sup> (1 meV Å<sup>-2</sup> ≈ 16.02 × 10<sup>-3</sup> J m<sup>-2</sup>). For systems with a Pt(111) lattice, 1 meV per surface atom corresponds to 0.1451 meV Å<sup>-2</sup> for a slab of identical thickness (nearest neighbor distance 2.82 Å). Results were obtained using RPBE/PAW. For results obtained using PBE/PAW see Table 2.

|                                         |                   | Pt <sub>1</sub> | Pt <sub>2</sub> | Pt <sub>3</sub> | Pt <sub>4</sub> |
|-----------------------------------------|-------------------|-----------------|-----------------|-----------------|-----------------|
|                                         | $\theta_{Pt}$     | 1/9             | 2/9             | 3/9             | 4/9             |
| PtAg/Pt <sub>4L</sub>                   | $\Delta H$        | -34.8           | -30.5           | -26.1           | -21.8           |
|                                         | $\Delta H_{diff}$ | -34.8           | -26.1           | -17.4           | -8.7            |
|                                         | $E_S$             | 67.4            | 69.5            | 72.2            | 74.4            |
| PtAg/Ag <sub>1L</sub> /Pt <sub>3L</sub> | $\Delta H$        | -37.7           | -39.2           | -40.6           | -39.2           |
|                                         | $\Delta H_{diff}$ | -37.7           | -40.6           | -43.5           | -34.8           |
|                                         | $E_S$             | 66.4            | 65.6            | 64.8            | 65.2            |
| PtAg/Ag <sub>2L</sub> /Pt <sub>2L</sub> | $\Delta H$        | -29.0           | -27.6           | -27.6           | -26.1           |
|                                         | $\Delta H_{diff}$ | -29.0           | -26.1           | -27.6           | -21.8           |
|                                         | $E_S$             | 70.6            | 71.1            | 71.1            | 71.8            |

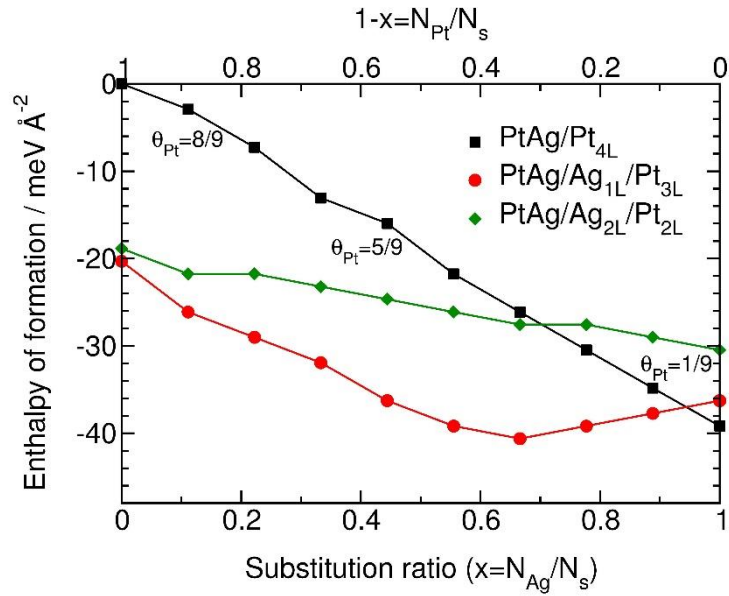

Figure S1. Formation enthalpies  $\Delta H$  in  $\text{meV } \text{\AA}^{-2}$  for the  $\text{Pt}_{1-x}\text{Ag}_x/\text{Ag}_{n\text{L}}/\text{Pt}(111)$  monolayer surface alloys as a function of the substitution ratio  $x$  in the surface layer, i.e., the number of Pt atoms replaced by Ag atoms in the topmost layer relative to the total number of surface atoms (9). The  $1-x$  scale at the upper x-axis describes the fraction of Pt atoms in the topmost layer, which also corresponds to the Pt coverage  $\Theta_{\text{Pt}}$  in the topmost layer. Results were obtained using RPBE/PAW (for similar data obtained by PBE/PAW see Figure 1).

Table S3. Center of the d-band and relative shift of the d-band in eV for different PtAg surface alloys. Results were obtained using RPBE/PAW. For results using PBE/PAW see Table 3.

|                                                                     | d-band center | $\Delta_{\text{d-band center}}$ |
|---------------------------------------------------------------------|---------------|---------------------------------|
| Pt(111)                                                             | -2.00         |                                 |
| Pt <sub>1</sub> Ag <sub>8</sub> /Pt <sub>4L</sub>                   | -1.48         | 0.52                            |
| Pt <sub>2</sub> Ag <sub>7</sub> /Pt <sub>4L</sub>                   | -1.63         | 0.37                            |
| Pt <sub>3</sub> Ag <sub>6</sub> /Pt <sub>4L</sub>                   | -1.69         | 0.31                            |
| Pt <sub>1</sub> Ag <sub>8</sub> /Pt <sub>4L</sub>                   | -1.48         |                                 |
| Pt <sub>1</sub> Ag <sub>8</sub> /Ag <sub>1L</sub> /Pt <sub>3L</sub> | -1.52         | 0.04                            |
| Pt <sub>1</sub> Ag <sub>8</sub> /Ag <sub>2L</sub> /Pt <sub>2L</sub> | -1.57         | 0.09                            |
| Ag(111)                                                             | -3.87         |                                 |

TABLE S4. Mean adsorption CO energies for different  $Pt_n$  ensembles, adsorption sites and  $CO_{ad}$  coverages on  $Pt_nAg_{9-n}/Pt_{4L}$  surface alloys, calculated using RPBE/PAW. The configurations are shown in Figure 3 ( $Pt_2$ ,  $Pt_3$ ), Figure 4 ( $Pt_{3,L}$ ), Figure 5 ( $Pt_{6,L}$ ), Figure 6 ( $Pt_1$ ) and Figure 7 ( $Pt_{2,d}$ ,  $Pt_{3,d}$ ). Energies are given in eV per  $CO_{ad}$  molecule, angles refer to the tilt of the CO molecules with respect to the surface normal (see text. For energies calculated using PBE/PAW see Figures 3-7.

|            | Site           | $\theta_{CO} = 1/9$ | $\theta_{CO} = 2/9$ | $\theta_{CO} = 3/9$ | $\theta_{CO} = 4/9$ |
|------------|----------------|---------------------|---------------------|---------------------|---------------------|
| $Pt_1$     | T              | -1.74 (0.0°)        | -                   | -                   | -                   |
|            | B-B            | -                   | -0.72 (26.6°)       | -                   | -                   |
|            | H-fcc / H-hcp  | -                   | -0.70 (20°)         | -                   | -                   |
| $Pt_2$     | T              | -1.67 (0.1°)        | -1.61 (4.3°)        | -                   | -                   |
|            | B              | -1.58 (0.0°)        | -                   | -                   | -                   |
| $Pt_3$     | T              | -1.66 (-0.3°)       | -1.59 (4.4°)        | -1.55 (4.3°)        | -                   |
|            | B              | -1.58 (-0.1°)       | -                   | -                   | -                   |
|            | H-fcc          | -1.56 (0.0°)        | -                   | -                   | -                   |
|            | H-hcp          | -1.54 (0.0°)        | -                   | -                   | -                   |
| $Pt_{2,d}$ | T              | -1.75 (0.0°)        | -1.74 (-0.2°)       | -                   | -                   |
| $Pt_{3,d}$ | T              | -1.70 (0.0°)        | -                   | -1.76 (0.0°)        | -                   |
| $Pt_{3,L}$ | T              | -1.40 (0.0°)        | -1.57 (5.8°)        | -1.32(0.0°)         | -                   |
|            | B              | -1.59 (0.0°)        | -1.51 (1.8°)        | -1.27 (0.0°)        | -                   |
| $Pt_{6,L}$ | T              | -1.59 (0.0°)        | -                   | -                   | -                   |
|            | $T_{disperse}$ | -                   | -1.53 (0.0°)        | -1.43 (3.5°-7.6°)   |                     |
|            | $T_{compact}$  | -                   | -1.52 (5.1°)        | -1.44 (4.0°- 7.5°)  | -1.40 (4.0°- 7.0°)  |
|            | $B_{out}$      | -1.58 (0.0°)        | -                   | -                   | -                   |
|            | $B_{in}$       | -1.48 (0.0°)        | -                   | -                   | -                   |
|            | H-fcc          | moves to B          | -                   | -                   | -                   |
|            | H-hcp          | -1.48 (0.0°)        | -                   | -                   | -                   |
